# Supplementary material for: Selective Small Molecule Stat3 Inhibitor Reduces Breast Cancer Tumor-Initiating Cells and Improves Recurrence Free Survival in a Human-Xenograft Model
Source: PLoS One. 2012 Aug 6;7(8):e30207. doi: 10.1371/journal.pone.0030207 (PMC3412855; doi:10.1371/journal.pone.0030207)
Supplement: Table S3 — Tumor volume fold change for MC1 tumor xenograft (statistics). (XLS) [file pone.0030207.s004.xls]

## Sheet: MC1 Tumor Volume Fold Change
Table S3. Tumor volume fold change for MC1 tumor xenograft (statistics).
Strata Comparison		P†
Treatment
Vehicle	Docetaxel	0.0609
Vehicle	C188	0.8197
Vehicle	Combo	0.0406
Docetaxel	C188	0.0288
Docetaxel	Combo	0.8197
C188	Combo	0.0201
†: p-values are based on contrasts from a
generalized linear model and adjusted for
multiple comparisons using Hommel's method
